# Supplementary material
Source: PubMed Central journal article supplement (PMC2945541)
Supplement: supp_M110.131698_jbc.M110.131698-1.pdf [file supp_M110.131698_jbc.M110.131698-1.pdf]

# The Reciprocal Regulation of Gamma-synuclein and Insulin-like Growth Factor-I (IGF-I) Receptor Expression Creates a Circuit that Modulates IGF-I Signaling

Minjing Li<sup>1¶</sup>, Yancun Yin<sup>1¶</sup>, Hui Hua<sup>1</sup>, Xiangming Sun<sup>1</sup>, Ting Luo<sup>2</sup>, Jiao Wang<sup>3</sup>, Yangfu Jiang<sup>1</sup>

State Key Laboratory of Biotherapy, Section of Signal Transduction and Molecular Targeted Therapy, West China Hospital, Sichuan University, Chengdu, 610041, China.

## Supplementary data

**Table 1** Target sequences of small interfering RNA

| siRNA      | Target sequences (5'-3') |
|------------|--------------------------|
| siSNCG-1   | GCAGCTGAGAAGACCAAGG      |
| siSNCG-2   | GGAGAATGTTGTACAGAGC      |
| siSNCG-3   | GGTGTGGCATCCAAAGAGA      |
| siIGF-IR-1 | CAATGAGTACAACTACCGC      |
| siIGF-IR-2 | CAACGAAGCTTCTGTGATG      |
| siIRS1     | CAAGACAGCTGGTACCAGG      |
| siIRS2-1   | GTACATCAACATCGACTTT      |
| siIRS2-2   | CCTCAACAACAACAACAAC      |

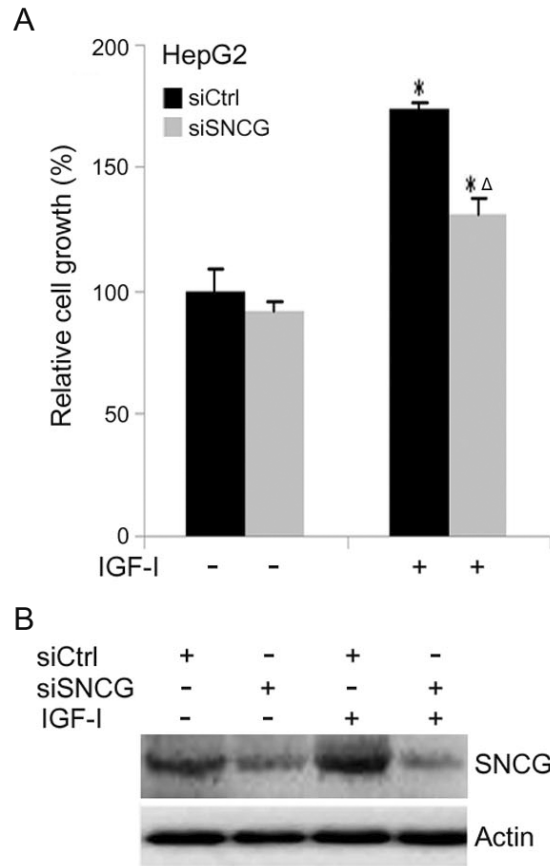

**Figure 1 SNCG knockdown suppresses IGF-I-induced HepG2 cell growth.** *A*, HepG2 cells were transfected with siCtrl or siSNCG. Twenty-four hours later, the cells were treated with or without 5 ng/mL IGF-I for 5 days. Cell number was counted. The relative cell growth was plotted. *Bars*, SE. The cell number in siCtrl-transfected and IGF-I-untreated group was set as 100%. \*,  $p < 0.05$ , compared to IGF-I-untreated counterparts.  $\Delta$ ,  $p < 0.05$ , compared to IGF-I-treated siCtrl cells. A representative of three independent experiments was shown. *B*, In parallel, cell lysates from siCtrl- or siSNCG-transfected cells were harvested and subjected to Western blot analysis of SNCG expression.
